# Supplementary material
Source: PubMed Central journal article supplement (PMC3607404)
Supplement: NIHMS356109-supplement-Supplementary_information.pdf [file NIHMS356109-supplement-Supplementary_information.pdf]

The critical role of hepatocyte growth factor receptor during liver stage infection is not conserved among *Plasmodium* species

Alexis Kaushansky and Stefan H.I. Kappe

**Supplementary Information**

a

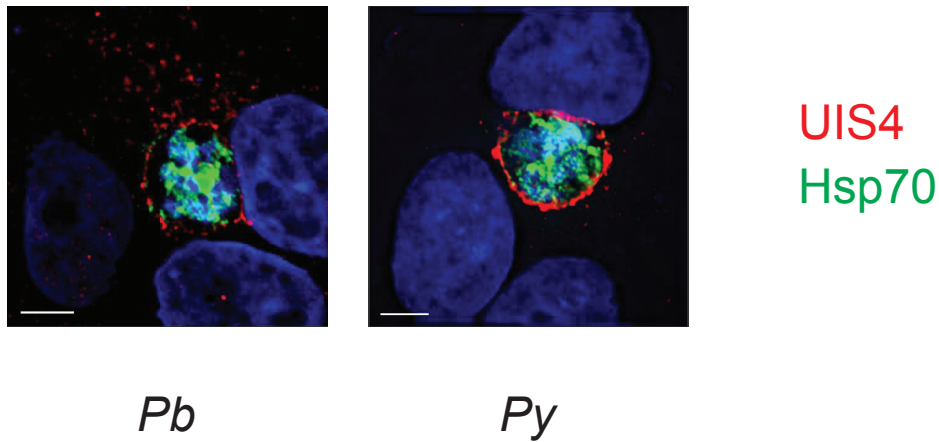

b

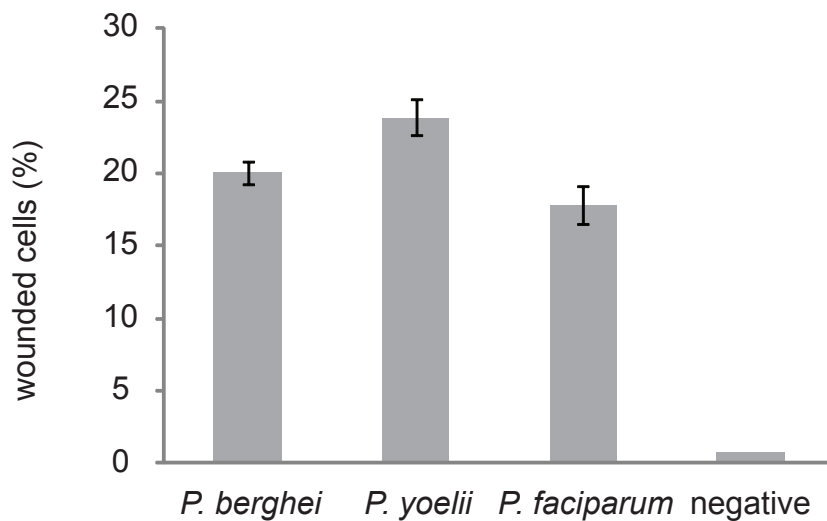

**Supplementary Figure 1.** (a) *P. berghei* and *P. yoelii* development in HepG2-CD81 cells after 24 hr. Parasites visualized in this manner were counted in Figure 1c. Staining for the parasitophorous vacuole membrane upregulated in infectious sporozoites 4 protein (UIS4) is shown in red and staining for the cytosolic protein Heat shock protein 70 (Hsp70) is shown in green. The scale bar represents 5  $\mu$ m. (b) Cell wounding assay demonstrating rates of traversal for each *Plasmodium spp.* Cells were incubated with sporozoites and Alexa-fluor-488-labeled dextran for 1 hr, then washed and allowed to recover for an additional 3 hrs. Cells were then analyzed for dextran-positive cells by fluorescence-activated-cells sorting (FACS).

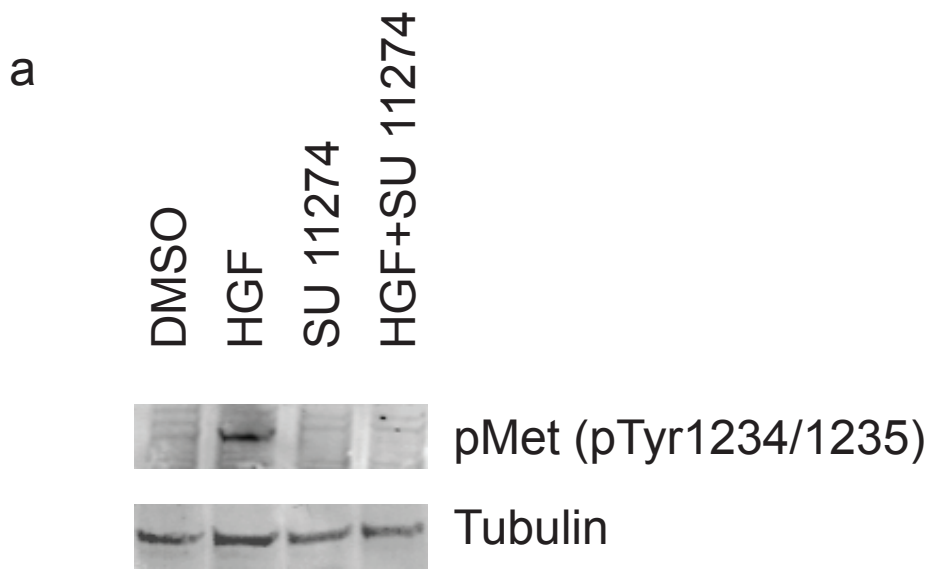

**Supplementary Figure 2.** Immunoblot demonstrating the efficacy of SU11274 in inhibiting HGF-induced Met activation in HepG2-CD81 cells.
